# Supplementary material
Source: MDPI journal article supplement (https://www.mdpi.com/2071-1050/13/6/3246)
Supplement: s1 [file s1]

# **Spatial Analysis of the Drivers, Characteristics, and Effects of Forest Fragmentation**

**Zoe Slattery <sup>1</sup> and Richard Fenner <sup>2,\*</sup>**

<sup>1</sup> Development Engineer, Smart Villages Research Group, Oxfordshire, UK; [zoerslattery@gmail.com](mailto:zoerslattery@gmail.com)

<sup>2</sup> Centre for Sustainable Development, Department of Engineering, Cambridge University, Cambridge CB2 1PZ UK

\* Correspondence: [raf37@cam.ac.uk](mailto:raf37@cam.ac.uk)

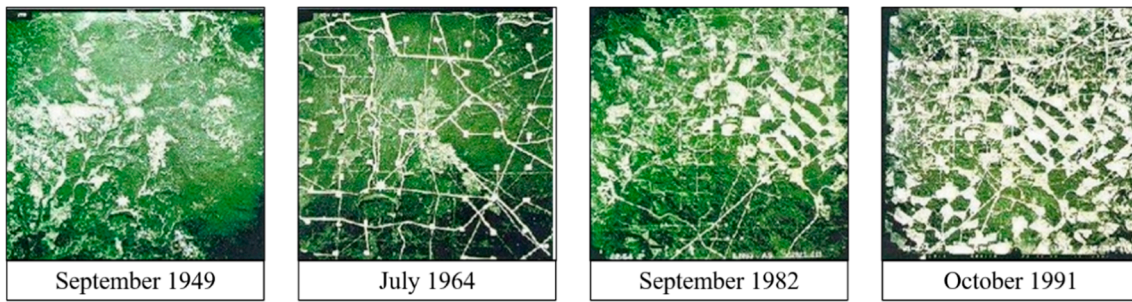

**Figure S1.** A time-lapse of forest fragmentation in northern Alberta, showing forest being slowly overtaken by agricultural and urban land in 1949, 1964, 1982 and 1991. Source: [1]

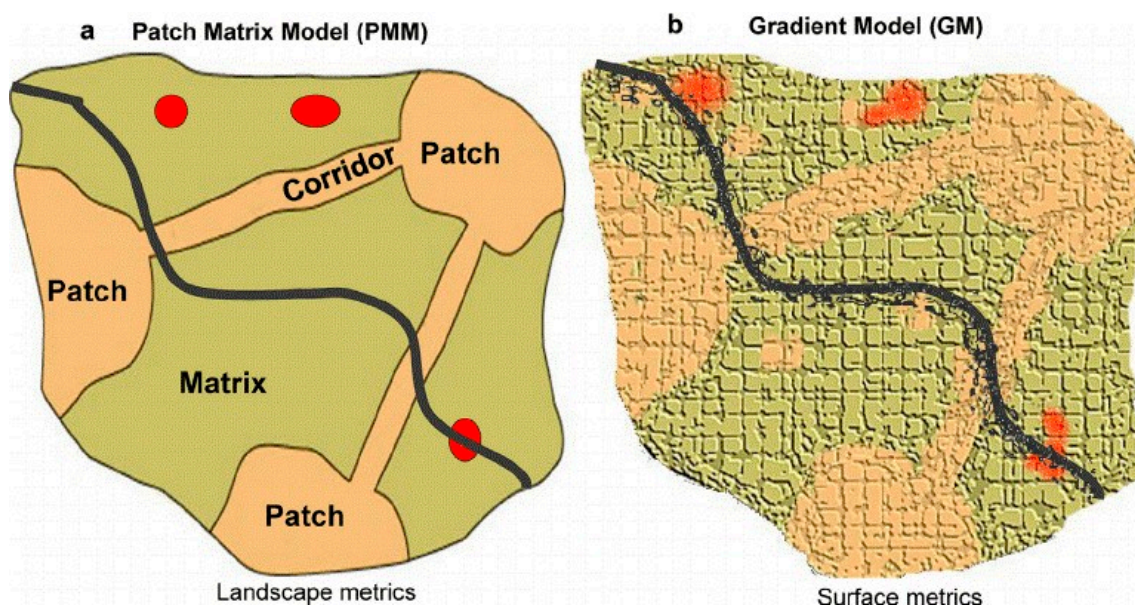

**Figure S2.** A pictorial representation of the difference between the patch-matrix and gradient surface models.  
Source [2]

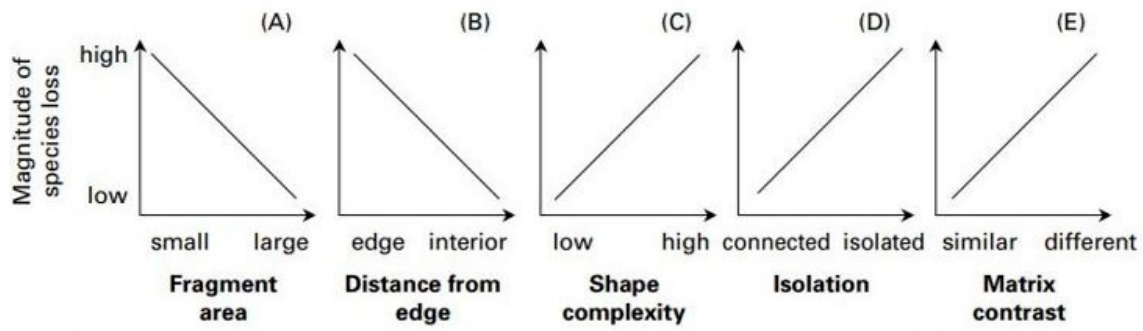

**Figure S3.** Graphs depicting common generalisations about species responses to fragmentation of their habitats. Source [3]

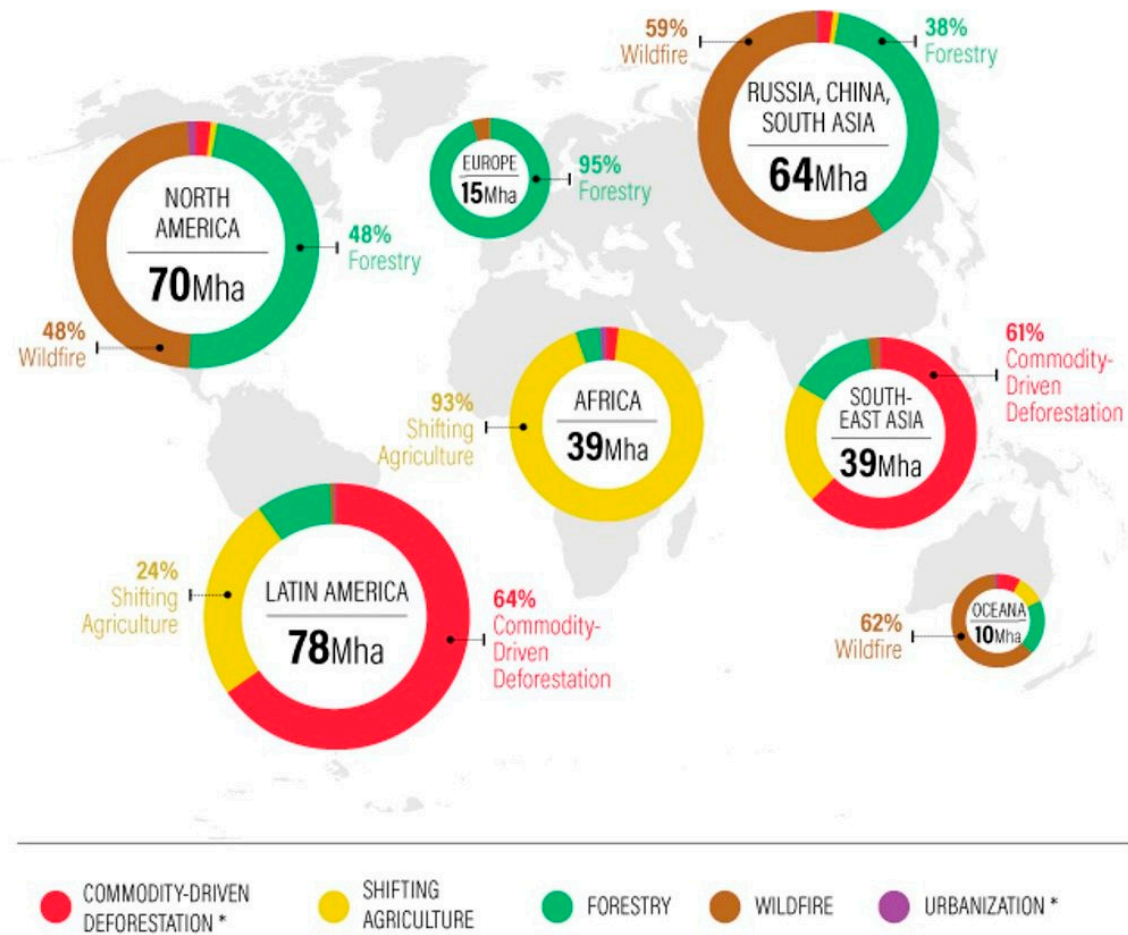

**Figure S4.** A map of regional tree cover loss by driver between 2001 and 2015. Source [4]

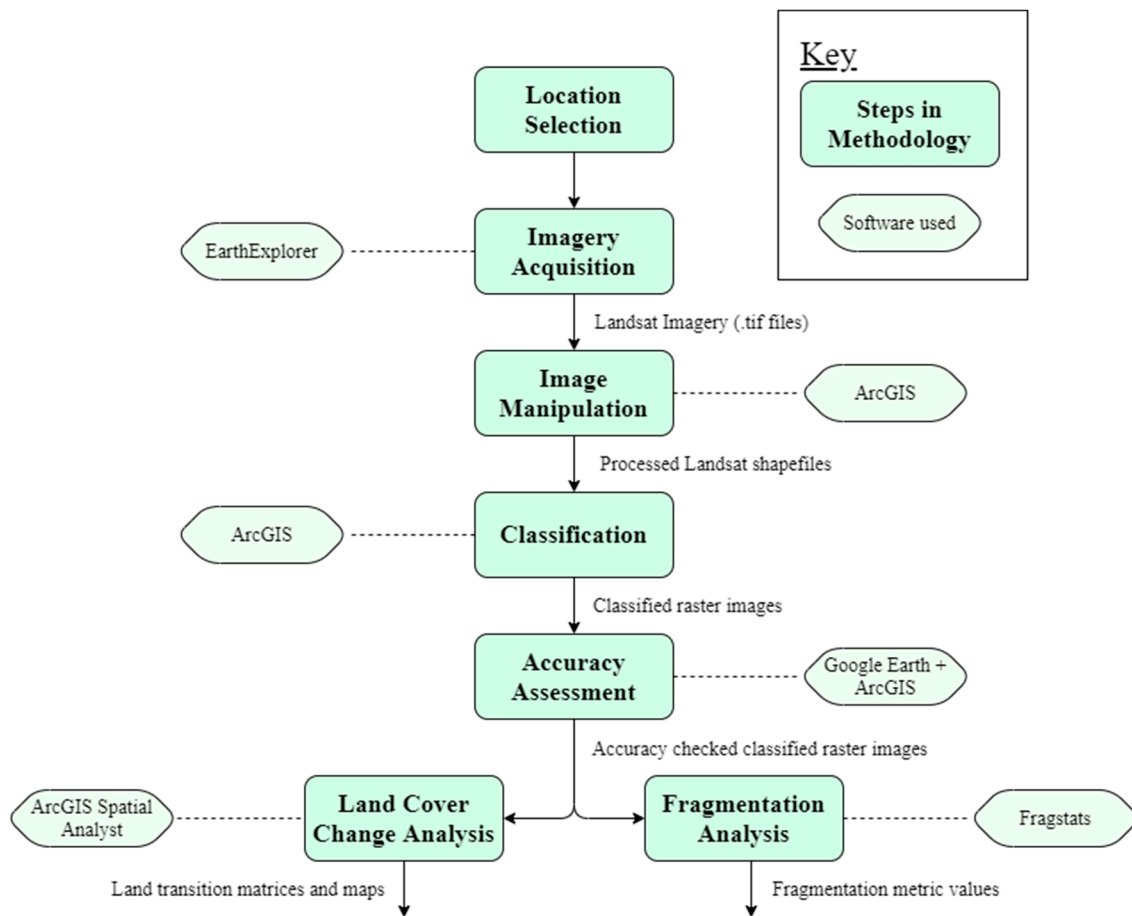

**Figure S5.** A flow diagram of the steps taken in this study to derive fragmentation information, with relevant software.

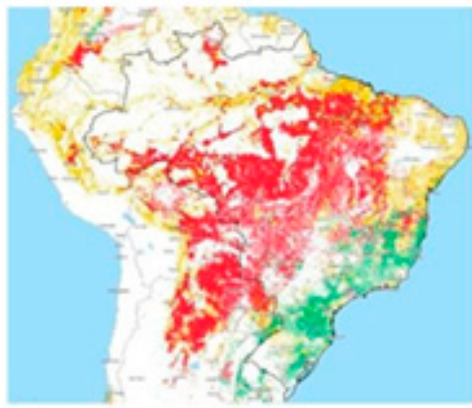

Commodity-driven deforestation  
Shifting agriculture  
Forestry  
Wildfire  
Urbanisation

**Figure S6.** Tree cover loss by dominant driver in Brazil. Source [5]

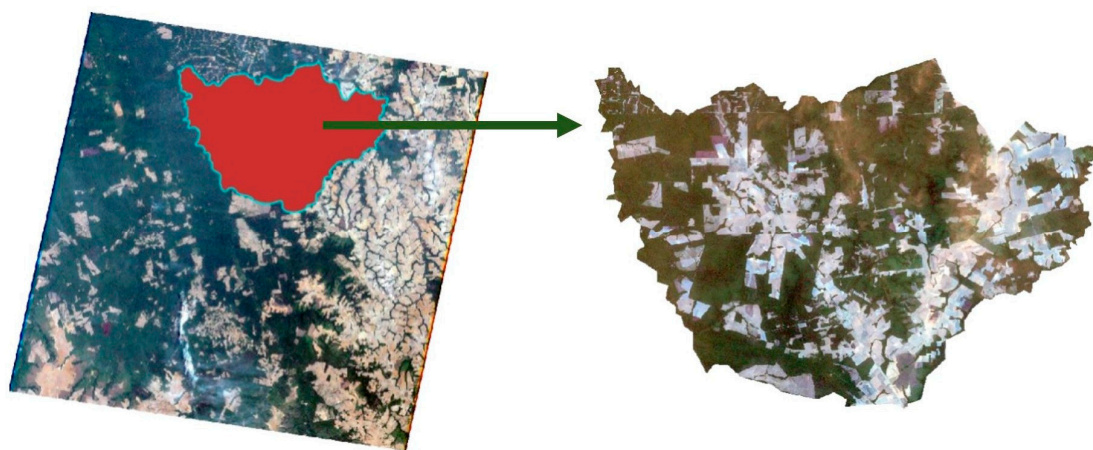

**Figure S7.** An example clip of the municipality of Tapurah from a Landsat scene Figure 2000.



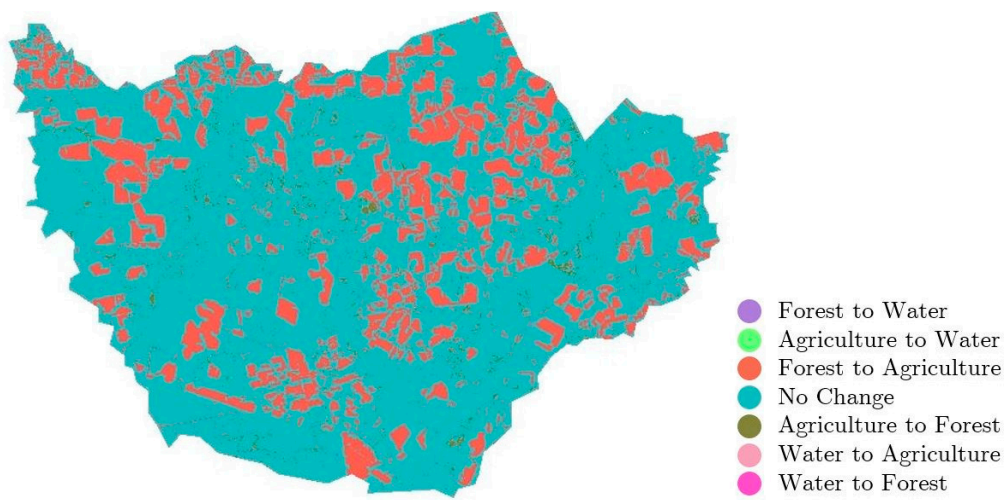

**Figure S8.** A difference map showing the land cover changes in Tapurah from years 2000 to 2019.

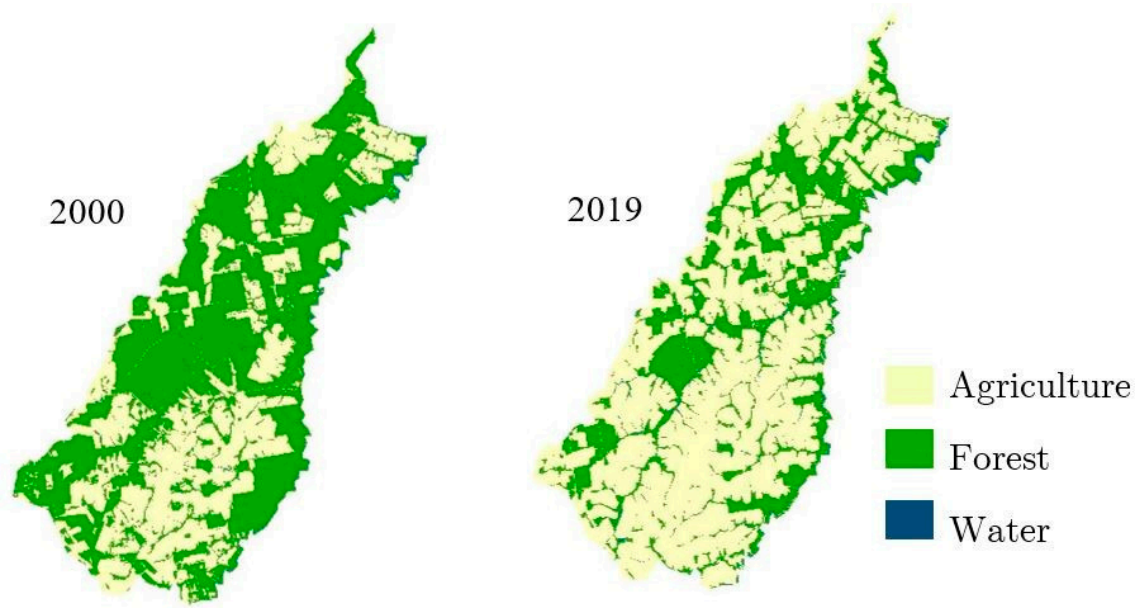

**Figure S9.** A land cover map of the municipality of Ipiranga do Norte, which experienced the greatest loss of total forest area over the 19 years of study.

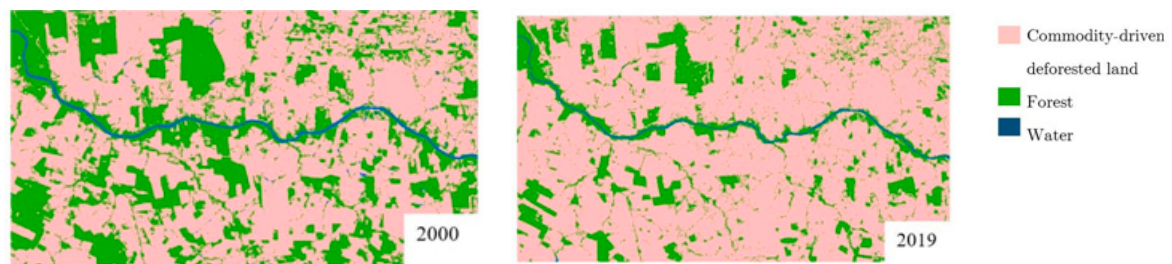

**Figure S10.** A close-up land cover map of the municipality of Cacoal, which experienced the greatest reduction in mean forest patch area.

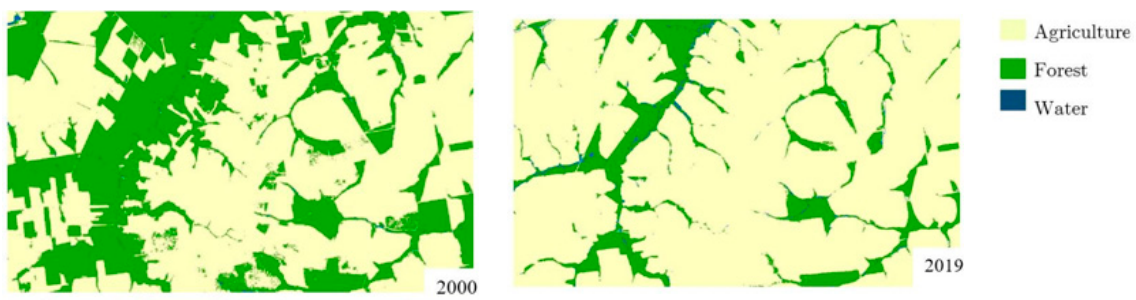

**Figure S11.** A close-up land cover map of the municipality of Ipiranga do Norte, which experienced the greatest increase in area-weighted edge length.

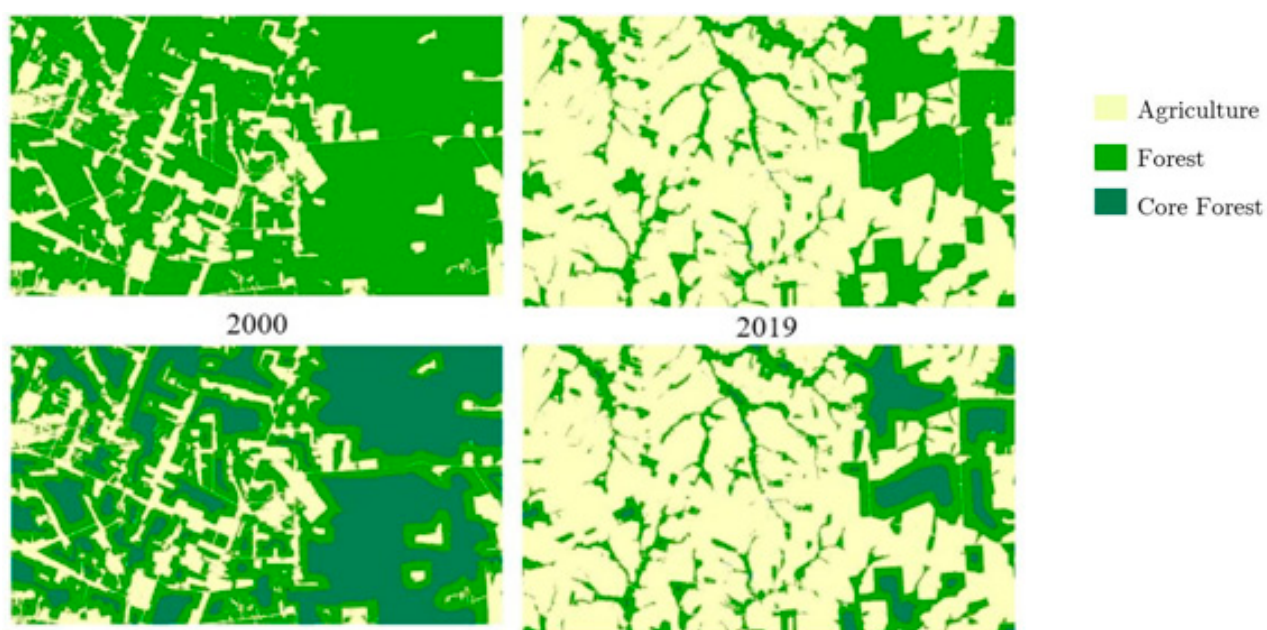

**Figure S12:** A close-up land cover map of the municipality of Itanhangá. The top two images Scheme 2000. to 2019, whilst the bottom two show the same but with core forest area highlighted in dark green.

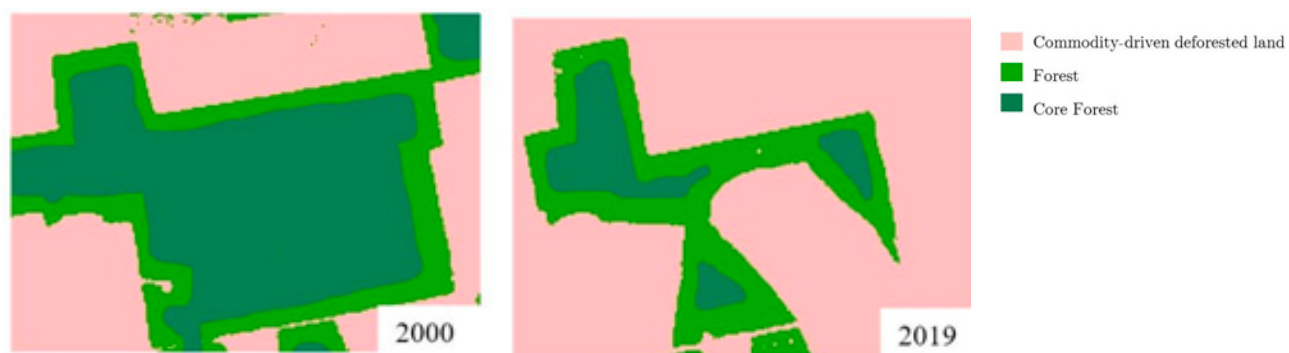

**Figure S13.** A close-up land cover map of the municipality of Cacoal, demonstrating an increasing number of disjunct core areas.

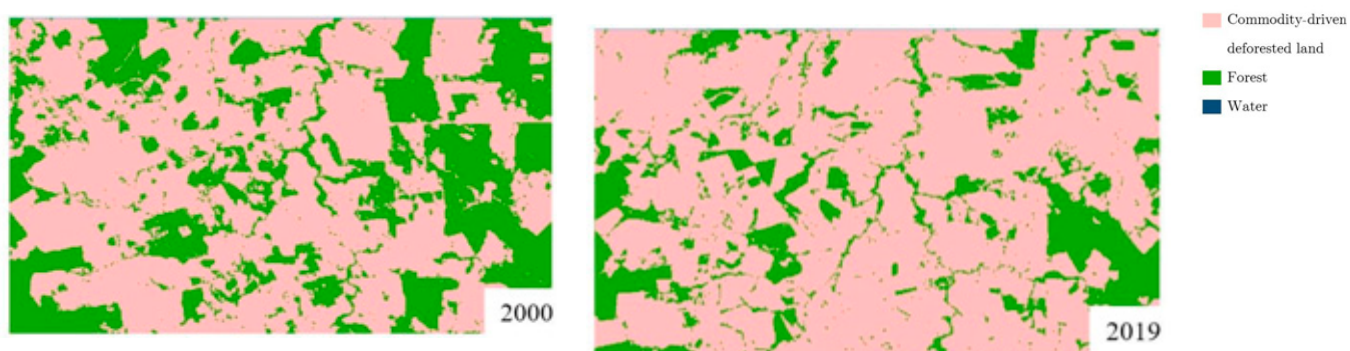

**Figure S14.** A close-up land cover map of the municipality of Pimenta Bueno, demonstrating

**Table S1.** An error matrix demonstrating the likelihood of incorrect classification for the Tapurah 2000 image.

|        |             | Classification |             |       |
|--------|-------------|----------------|-------------|-------|
|        |             | Forest         | Agriculture | Water |
|        |             |                |             |       |
| Aerial | Forest      | 44             | 4           | 4     |
|        | Agriculture | 0              | 52          | 1     |
|        | Water       | 0              | 0           | 5     |

**Table S2.** A Land Cover Transition Matrix for the state of Tapurah between the years 2000 and 2019 showing the total land cover change between land types in km<sup>2</sup>. Each cell  $a_{ij}$  represents the total area which was class type  $i$  in 2000, and had transitioned to class type  $j$  by 2019. Total areas of each class type for the years 2000 and 2019 are provided in the far right column and bottom row respectively.

|              |             | 2019   |             |       | Total (2000) |
|--------------|-------------|--------|-------------|-------|--------------|
|              |             | Forest | Agriculture | Water |              |
| 2000         | Forest      | 2129.8 | 958.9       | 6.4   | 3095.2       |
|              | Agriculture | 57.2   | 1810.3      | 0.9   | 1868.6       |
|              | Water       | 0.9    | 0.1         | 9.2   | 10.1         |
| Total (2019) |             | 2188.0 | 2769.4      | 16.5  | 4973.9       |



## Supplementary Information SI1

### Landscape Models

There are currently two main models used by landscape ecologists to understand landscape patterns - the '*Patch-Matrix Model*' (PMM) and the '*Gradient Surface Model*' (GSM) (Figure S2). Other models are generally extensions of these [6]. Each model provides different landscape information as a basis from which to measure fragmentation.

The Patch-Matrix Model (PMM) (or 'patch-corridor-matrix' model) proposes that landscapes be classified as a mosaic of different '*patches*' with distinct boundaries between landscape types [7]. Patches form the simplest elements in a landscape such as areas of water, forest stands or any other relatively homogenous ecological feature. The PMM is often praised for its simplicity, as in this model any variation within a habitat patch is ignored to provide a landscape structure which is conceptually simple to understand [8]. However, there can be a drastic reduction in information that comes from ignoring heterogeneity within patches and the approach has the disadvantage that it can hide ecologically important findings [6]. However, PMM is by far the most common method, with a wide range of forest fragmentation studies performed using metrics derived from categorical patch-matrix landscape maps [9–13] (To overcome the issue of simplicity [14] have used graph theory analysis, to evaluate the ease of movement of particular species between habitat patches by representing paths between patches as weighted connectors, thus demonstrating the impact that fragmentation has on the potential for movement.

Unlike the patch-matrix model, the GSM does not assume homogeneity of ecological values within patches. It does not attempt to classify land-use into patches at all, but instead considers only continuous surface characteristics [6]. Practical examples of these could be the vegetation cover, canopy density or height at every point on a landscape surface. By not confining pixels in an image to a single land use category, but instead assigning ratio values to each pixel, the true heterogeneity of the landscape can be captured [6]. However, the difficulty associated with determining GSM values such as tree density from remote imaging is a limiting factor.

## Supplementary Information SI2

### Fragmentation Metrics

There are several levels at which metrics can be measured to investigate landscape fragmentation. These are grid cell, patch, class and landscape [15]. Grid cells refer to the smallest image unit that can be distinguished, which depends on image quality. A commonly used resolution value is  $30\text{m}^2$ , as in Landsat imagery [9] use grid cell- level fragmentation measures to produce a binary forest/non-forest map of an area through categorising each  $30\text{m}^2$  grid cell and computing the number of adjacent pixel pairs which were both categorised as forest. Whilst this approach provides a holistic view of a landscape, there are relatively few metrics that can be computed from grid cells [15,16] . A class refers to all patches of a given type, such as all forest patches. Class-level metrics aggregate information over all patches of the given class, such as 'total forest area' and 'mean patch size' [10]. (PMM studies tend to use a combination of both patch- and class-level metrics but an issue is the strong interdependency between many of these measures.

Landscape metrics refer to the collection of metrics of all class types, such as all forest, grassland, water and urban classes [15]. *Landscape-level metrics* therefore aggregate information over all classes, such as average patch area of all classes, so are less useful if attempting to quantify fragmentation of a particular land use type or for a species which is suited to specific habitat types.

## Supplementary Information SI3

### Structure versus Function

*Structural fragmentation metrics* are those that do not explicitly relate to an ecological process, but instead describe the physical configuration of a landscape. Fragmentation studies using structural metrics are by far the most numerous with many examples in relevant literature [17–21]. Structural measurements often relate to area, distance between neighbouring patches, edge density, patch shape, core area, and aggregation, among others. Such measurements can use increasingly more abstract and complex mathematical principles such as morphological spatial pattern analysis and fractal geometry, but these are all still computed from the same base categorical landscape maps. All structural connectivity measurements suffer from the same drawback in that they are difficult to relate to real-life ecological processes [15]

In contrast, *functional fragmentation metrics* relate the landscape pattern explicitly to ecological processes such as its ability to support species' populations [15]. Measurement of functional connectivity is a less popular method because it is far more difficult to quantify from spatial configuration alone [22]. Studies which use functional metrics consider how landscape fragmentation affects aspects such as metapopulation capacity, meaning the ability of a landscape to support species metapopulations, time spent searching for a new habitat patch, or ease of movement of indicator species [23,24]. It is difficult to determine to what extent models of species' behaviour in fragmented landscapes reflects genuine behaviour, meaning studies involving functional metrics are rare [24]. It is therefore far more common for studies to first define structural composition of a landscape using structural fragmentation metrics, and then attempt to compute their functional relevance from ground studies or species' behaviour models at a later date.

## References (for Supplementary material)

1. Williamson, T.; Shuffler, M.; Strickland, C. Habitat Fragmentation. 2016. Available online: <http://habitatfragmentationupstate.weebly.com/> (accessed on 22 May 2020).
2. Lausch, A.; Blaschke, T.; Haase, D.; Herzog, F.; Syrbe, R.-U.; Tischendorf, L.; Walz, U. Understanding and quantifying landscape structure—A review on relevant process characteristics, data models and landscape metrics. *Ecol. Model.* **2015**, *295*, 31–41.
3. Ewers, R.M.; Didham, R., 2006. ‘Confounding factors in the detection of species responses to habitat fragmentation’. *Biological Reviews*, *81*, 1, 117–142.
4. Harris, N.; Dow Goldman, E.; Weisse, M.; Barrett, A., 2018. When a Tree Falls, Is It De-forestation?. World Resource Institute. viewed 6.5.20. URL <https://www.wri.org/blog/2018/09/when-tree-falls-it-deforestation>
5. WRI, 2020. About GFW — Global Forest Watch. viewed 7.5.20. URL <https://www.globalforestwatch.org/about>
6. Frazier, A.; Kedron, P. Landscape Metrics: Past Progress and Future Directions. *Curr. Landsc. Ecol. Rep.* **2017**, *2*, 63–72, doi:10.1007/s40823017-0026-0.
7. Forman, R.T.T. *Land Mosaics: The Ecology of Landscapes and Regions*; Cambridge University Press: New York, NY, USA, 2008; pp. 3–40, doi:10.1017/9781107050327.003.
8. Kedron, P.; Frazier, A.; Ovando-Montejo, G.; Wang, J. Surface metrics for landscape ecology: A comparison of landscape models across ecoregions and scales. *Landsc. Ecol.* **2018**, *33*, 1489–1504.
9. Chakraborty, A.; Ghosh, A.; Sachdeva, K.; Joshi, P.K. Characterizing fragmentation trends of the Himalayan forests in the Kumaon region of Uttarakhand, India. *Ecol. Inform.* **2017**, *38*, 95–109, doi:10.1016/j.ecoinf.2016.12.006
10. Da Ponte, E.; Roch, M.; Leinenkugel, P.; Dech, S.; Kuenzer, C. Paraguay’s Atlantic Forest cover loss—Satellite-based change detection and fragmentation analysis between 2003 and 2013. *Appl. Geogr.* **2017**, *79*, 37–49, doi:10.1016/j.apgeog.2016.12.005.
11. Li, X.; Lu, L.; Cheng, G.; Xiao, H. Quantifying landscape structure of the Heihe River Basin, north-west China using FRAG-STATS. *J. Arid Environ.* **2001**, *48*, 521–535, doi:10.1006/jare.2000.0715.
12. Ren, X.; Lv, Y.; Li, M. Evaluating differences in forest fragmentation and restoration between western natural forests and south-eastern plantation forests in the United States. *J. Environ. Manag.* **2017**, *188*, 268–277, doi:10.1016/j.jenvman.2016.11.068.
13. Sulieman, H.M. Exploring Drivers of Forest Degradation and Fragmentation in Sudan: The Case of Erawashda Forest and its Surrounding Community. *Sci. Total Environ.* **2018**, *621*, 895–904, doi:10.1016/j.scitotenv.2017.11.210.
14. Ferrari, J.R.; Lookingbill, T.R.; Neel, M.C. Two measures of landscape-graph connectivity: Assessment across gradients in area and configuration. *Landsc. Ecol.* **2007**, *22*, 1315–1323, doi:10.1007/s10980-007-9121-7.
15. McGarigal, K.; Cushman, S. *Issues and Perspectives in Landscape Ecology*; Cambridge University Press: Cambridge, UK, 2005.
16. Brudvig, L.A.; Leroux, S.J.; Albert, C.H.; Bruna, E.M.; Davies, K.F.; Ewers, R.M.; Levey, D.J.; Pardini, R.; Resasco, J. Evaluating conceptual models of landscape change. *Ecography* **2017**, *40*, 74–84, doi:10.1111/ecog.02543.
17. Wang, X.; Blanchet, F.G.; Koper, N., 2014. ‘Measuring habitat fragmentation: An evaluation of landscape pattern metrics’. *Methods in Ecology and Evolution*. *5*, 634–646. <https://doi.org/10.1111/2041-210X.12198>
18. Zhang, Y.; Shen, W.; Li, M.; Lv, Y. Assessing spatio-temporal changes in forest cover and fragmentation under urban expansion in Nanjing, eastern China, from long-term Landsat observations (1987–2017). *Appl. Geogr.* **2020**, *117*, doi:10.1016/j.apgeog.2020.
19. Wulder, M.A.; White, J.C.; Andrew, M.E.; Seitz, N.E.; Coops, N.C. Forest fragmentation, structure, and age characteristics as a legacy of forest management. *For. Ecol. Manag.* **2009**, *258*, 1938–1949, doi:10.1016/j.foreco.2009.07.041.
20. Vieilledent, G.; Grinand, C.; Rakotomalala, F.A.; Ranaivosoa, R.; Rakotoarijaona, J.-R.; Allnutt, T.F.; Achard, F. Combining global tree cover loss data with historical national forest cover maps to look at six decades of deforestation and forest fragmentation in Madagascar. *Biol. Conserv.* **2018**, *222*, 189–197, doi:10.1016/j.biocon.2018.04.008.
21. Riitters, K.; Costanza, J. The landscape context of family forests in the United States: Anthropogenic interfaces and forest fragmentation from 2001 to 2011. *Landsc. Urban Plan.* **2019**, *188*, 64–71, doi:10.1016/j.landurbplan.2018.04.001.
22. Kindlmann, P.; Burel, F. Connectivity measures: A review. *Landsc. Ecol.* **2008**, *23*, 879–890, doi:10.1007/s10980-008-9245-4.
23. Hermes, C.; Döpper, A.; Schaefer, H.M.; Segelbacher, G., 2016. ‘Effects of forest fragmentation on the morphological and genetic structure of a dispersal-limited, endangered bird species’. *Nature Conservation*. *16*, 39–58. <https://doi.org/10.3897/natureconservation.16.10905>
24. Larrey-Lassalle, P.; Esnouf, A.; Roux, P.; Lopez-Ferber, M.; Rosenbaum, R.K.; Loiseau, E., 2018. “A methodology to assess habitat fragmentation effects through regional indexes: Illustration with forest biodiversity hotspots”. *Ecological Indicators*. *89*, 543–551. <https://doi.org/10.1016/j.ecolind.2018.01.068>
